# Supplementary material
Source: PubMed Central journal article supplement (PMC3699738)
Supplement: mmc1.pdf [file mmc1.pdf]

# Complex patterns of metabolic and $\text{Ca}^{2+}$ entrainment in pancreatic islets by oscillatory glucose

## SUPPORTING MATERIAL

Morten Gram Pedersen, Erik Mosekilde, Kenneth S. Polonsky, Dan S. Luciani

### Model equations

The model is as in Bertram et al. (2007), ref. 9 in the manuscript, except for the expression of the glucokinase rate  $J_{\text{GK}}$ . We refer to the original article for details on the rate expressions.

#### Glycolytic model

The glycolytic model describes the time evolution of glucose 6-phosphate ( $G6P$ , in  $\mu\text{M}$ ) and fructose 1,6-bisphosphate ( $FBP$ , in  $\mu\text{M}$ ) concentrations:

$$\frac{dG6P}{dt} = J_{\text{GK}} - J_{\text{PFK}}, \quad (1)$$

$$\frac{dFBP}{dt} = J_{\text{PFK}} - \frac{1}{2}J_{\text{GPDH}}, \quad (2)$$

where

$$J_{\text{GK}} = V_{\text{GK}} \frac{G^{n_{\text{GK}}}}{G^{n_{\text{GK}}} + K_{\text{GK}}^{n_{\text{GK}}}}, \quad (3)$$

$$J_{\text{GPDH}} = k_{\text{GPDH}} \sqrt{FBP / (1\mu\text{M})}, \quad (4)$$

$$J_{\text{PFK}} = V_{\text{max}} \frac{w_{1110} + \lambda \sum_{ijl} w_{ij1l}}{\sum_{ijkl} w_{ijkl}}, \quad (5)$$

with  $i, j, k, l \in \{0, 1\}$  and

$$w_{ijkl} = \frac{1}{f_{13}^{ik} f_{23}^{jk} f_{41}^{il} f_{42}^{jl} f_{43}^{kl}} \left( \frac{AMP}{K_1} \right)^i \left( \frac{FBP}{K_2} \right)^j \left( \frac{(0.3 G6P)^2}{K_3} \right)^k \left( \frac{(ATP)^2}{K_4} \right)^l. \quad (6)$$

## Mitochondrial model

The mitochondrial model describes the time evolution of mitochondrial membrane potential ( $\Psi_m$ , in mV) and mitochondrial concentrations of NADH ( $NADH_m$ , in mM),  $Ca^{2+}$  ( $Ca_m$ , in  $\mu\text{M}$ ) and ADP ( $ADP_m$ , in mM):

$$\frac{d\Psi_m}{dt} = (J_{H,\text{res}} - J_{H,\text{atp}} - J_{\text{ANT}} - J_{H,\text{leak}} - J_{\text{NaCa}} - 2J_{\text{uni}})/C_{\text{mito}}, \quad (7)$$

$$\frac{dNADH_m}{dt} = \gamma(J_{\text{PDH}} - J_{\text{O}}), \quad (8)$$

$$\frac{dCa_m}{dt} = -f_m(J_{\text{NaCa}} - J_{\text{uni}}), \quad (9)$$

$$\frac{dADP_m}{dt} = \gamma(J_{\text{ANT}} - J_{\text{F1F0}}), \quad (10)$$

where

$$J_{H,\text{res}} = \left( \frac{p_8 NADH_m}{p_9 + NADH_m} \right) \left( \frac{1}{1 + \exp((\Psi_m - p_{10})/p_{11})} \right), \quad (11)$$

$$J_{\text{F1F0}} = \left( \frac{p_{13}}{p_{13} + ATP_m} \right) \left( \frac{p_{16}}{1 + \exp(-(\Psi_m - p_{14})/p_{15})} \right), \quad (12)$$

$$J_{H,\text{atp}} = 3J_{\text{F1F0}}, \quad (13)$$

$$J_{\text{ANT}} = p_{19} \frac{ATP_m}{ATP_m + p_{20}ADP_m} \exp(0.5\Psi_m F/(RT)), \quad (14)$$

$$J_{H,\text{leak}} = p_{17}\Psi_m + p_{18}, \quad (15)$$

$$J_{\text{NaCa}} = p_{23} \exp(p_{24}\Psi_m) Ca_m / Ca_c, \quad (16)$$

$$J_{\text{uni}} = (p_{21}\Psi_m - p_{22}) Ca_c^2, \quad (17)$$

$$J_{\text{PDH}} = \left( \frac{p_1 NAD_m}{p_2 NAD_m + NADH_m} \right) \left( \frac{Ca_m}{p_3 + Ca_m} \right) (J_{\text{GPDH}} + J_{\text{GPDHbas}}), \quad (18)$$

$$J_{\text{O}} = \left( \frac{p_4 NADH_m}{p_5 + NADH_m} \right) \left( \frac{1}{1 + \exp((\Psi_m - p_6)/p_7)} \right), \quad (19)$$

$$ATP_m = ATP_{m,\text{tot}} - ADP_m, \quad (20)$$

$$NAD_m = NAD_{m,\text{tot}} - NADH_m. \quad (21)$$

## Electrical/calcium model

The electrical/calcium model describes the time evolution of plasma membrane potential ( $V$ , in mV), a gating variable of the delayed rectifier  $K^+$  ( $K_v$ ) current ( $n$ , unitless),  $Ca^{2+}$  concentrations in the cytosol ( $Ca_c$ , in  $\mu\text{M}$ ) and the endoplasmic reticulum ( $Ca_{er}$ , in  $\mu\text{M}$ ), and cytosolic ADP

concentration ( $ADP_c$ , in  $\mu\text{M}$ ):

$$\frac{dV}{dt} = -(I_K + I_{Ca} + I_{K(Ca)} + I_{K(ATP)})/C_m, \quad (22)$$

$$\frac{dn}{dt} = (n_\infty(V) - n)/\tau_n, \quad (23)$$

$$\frac{dCa_c}{dt} = f_c(J_{\text{mem}} + (J_{\text{leak}} - J_{\text{SERCA}}) + \kappa(J_{\text{NaCa}} - J_{\text{uni}})), \quad (24)$$

$$\frac{dCa_{er}}{dt} = -f_{er}(V_c/V_{er})(J_{\text{leak}} - J_{\text{SERCA}}), \quad (25)$$

$$\frac{dADP_c}{dt} = (k_{hyd}Ca_c + k_{hyd,bas})ATP_c - \kappa J_{\text{ANT}}, \quad (26)$$

where

$$I_K = \bar{g}_K n(V - V_K), \quad (27)$$

$$I_{Ca} = \bar{g}_{Ca} m_\infty(V)(V - V_{Ca}), \quad (28)$$

$$I_{K(Ca)} = \bar{g}_{K(Ca)} \frac{Ca_c^2}{Ca_c^2 + K_D^2} (V - V_K), \quad (29)$$

$$I_{K(ATP)} = \bar{g}_{K(ATP)} o_\infty(ADP_c, ATP_c)(V - V_K), \quad (30)$$

and

$$n_\infty(V) = 1/(1 + \exp(-(V + 16\text{mV})/5\text{mV})), \quad (31)$$

$$m_\infty(V) = 1/(1 + \exp(-(V + 20\text{mV})/12\text{mV})), \quad (32)$$

$$o_\infty(ADP_c, ATP_c) = \frac{0.08(1 + 2MgADP^*) + 0.89(MgADP^*)^2}{(1 + MgADP^*)^2(1 + ADP^* + ATP^*)}, \quad (33)$$

$$ATP_c = ATP_{c,tot} - ADP_c. \quad (34)$$

Here,  $MgADP^* = 0.165ADP_c/17\mu\text{M}$ ,  $ADP^* = 0.135ADP_c/26\mu\text{M}$ , and  $ATP^* = 0.05ATP_c/1\mu\text{M}$ . Finally,

$$J_{\text{mem}} = -\alpha I_{Ca} - k_{\text{PMCA}}(Ca - Ca_b), \quad (35)$$

$$J_{\text{leak}} = p_{\text{leak}}(Ca_{er} - Ca_c), \quad (36)$$

$$J_{\text{SERCA}} = k_{\text{SERCA}}Ca_c. \quad (37)$$

**Parameters**

$$\begin{array}{llll}
V_{\text{GK}} = 0.001 \mu\text{M}/\text{ms}, & K_{\text{GK}} = 7 \mu\text{M}, & n_{\text{GK}} = 4, & k_{\text{GPDH}} = 0.0005 \mu\text{M}/\text{ms}, \\
V_{\text{max}} = 0.005 \mu\text{M}/\text{ms}, & \lambda = 0.06, & f_{13} = 0.02, & f_{23} = 0.2, \\
f_{41} = 20, & f_{42} = 20, & f_{43} = 20, & K_1 = 30 \mu\text{M}, \\
K_2 = 1 \mu\text{M}, & K_3 = 50000 \mu\text{M}, & K_4 = 220 \mu\text{M}, & \text{AMP}_c = 500 \mu\text{M}. \\
\\
C_{\text{mito}} = 1.8 \mu\text{M}/\text{mV}, & \gamma = 0.001 \text{mM}/\mu\text{M}, & f_m = 0.01, & p_1 = 400, \\
p_2 = 1, & p_3 = 0.01 \mu\text{M}, & p_4 = 0.6 \mu\text{M}/\text{ms}, & p_5 = 0.1 \text{mM}, \\
p_6 = 177 \text{mV}, & p_7 = 5 \text{mV}, & p_8 = 7 \mu\text{M}/\text{ms}, & p_9 = 0.1 \text{mM}, \\
p_{10} = 177 \text{mV}, & p_{11} = 5 \text{mV}, & p_{13} = 10 \text{mM}, & p_{14} = 190 \text{mV}, \\
p_{15} = 8.5 \text{mV}, & p_{16} = 35 \mu\text{M}/\text{ms}, & p_{17} = 0.002 \mu\text{M}/(\text{ms} \cdot \text{mV}), & p_{18} = -0.03 \mu\text{M}/\text{ms}, \\
p_{19} = 0.35 \mu\text{M}/\text{ms}, & p_{20} = 2, & p_{21} = 0.04 (\mu\text{M} \cdot \text{ms} \cdot \text{mV})^{-1}, & p_{22} = 1.1 (\mu\text{M} \cdot \text{ms})^{-1}, \\
p_{23} = 0.01 \mu\text{M}/\text{ms}, & p_{24} = 0.016 \text{mV}^{-1}, & \text{ATP}_{m,\text{tot}} = 15 \text{mM}, & \text{NAD}_{m,\text{tot}} = 10 \text{mM}, \\
F/(RT) = 96480/(310.16 \cdot 8315) \text{mV}^{-1} = 0.0374 \text{mV}^{-1}, & & & J_{\text{GPDHbas}} = 0.0005 \mu\text{M}/\text{ms}. \\
\\
C_m = 5300 \text{fF}, & \tau_n = 20 \text{ms}, & f_c = 0.01, & \kappa = 0.0733, \\
f_{er} = 0.01, & V_c/V_{er} = 31, & k_{\text{hyd}} = 5 \cdot 10^{-5} (\mu\text{M} \cdot \text{ms})^{-1}, & k_{\text{hyd,bas}} = 5 \cdot 10^{-5} \text{ms}^{-1}, \\
\bar{g}_K = 2700 \text{pS}, & \bar{g}_{Ca} = 1000 \text{pS}, & \bar{g}_{K(Ca)} = 100 \text{pS}, & \bar{g}_{K(ATP)} = 12000 \text{pS}, \\
V_K = -75 \text{mV}, & V_{Ca} = 25 \text{mV}, & K_D = 0.5 \mu\text{M}, & \text{ATP}_{c,\text{tot}} = 2500 \mu\text{M}, \\
k_{\text{PMCA}} = 0.1 \text{ms}^{-1}, & Ca_b = 0.05 \mu\text{M}, & p_{\text{leak}} = 0.0002 \text{ms}^{-1}, & k_{\text{SERCA}} = 0.4 \text{ms}^{-1}, \\
\alpha = 4.50 \cdot 10^{-6} \mu\text{M}/(\text{ms} \cdot \text{fA}). & & & 
\end{array}$$
